# Supplementary material for: Fast and sensitive fluorescent detection of inorganic mercury species and methylmercury using a fluorescent probe based on the displacement reaction of arylboronic acid with the mercury species
Source: Royal Society of Chemistry journal article supplement (doi:10.1039/c9cc09240d), 2020-01-01
Supplement: c9cc09240d1.pdf [file c9cc09240d1.pdf]

## Electronic Supplementary Information

### Fast and sensitive fluorescent detection of inorganic mercury species and methylmercury using fluorescent probe based on displacement reaction of arylboronic acid with the mercury species

Lok Nath Neupane<sup>a</sup>, Joohee Park<sup>a</sup>, Pramod Kumar Mehta<sup>a</sup>, Eun-Taex Oh<sup>b</sup>, Heon Joo Park<sup>b</sup> and Keun-Hyeung Lee<sup>a,\*</sup>

<sup>a</sup>Center for Design and Applications of Molecular Catalysts, Department of Chemistry and Chemical Engineering, Inha University, 100 Inha-Ro, Yonghyun-Dong, Nam-Gu, Incheon 402-751, South Korea

<sup>b</sup>Department of Biomedical Sciences, College of Medicine, Inha University, Inha-Ro 100, Incheon city, 402-751, South Korea

E-mail: leekh@inha.ac.kr

#### Contents

|                                                |        |
|------------------------------------------------|--------|
| 1. Experimental Section                        | S3     |
| 1.1. Reagents                                  | S3     |
| 1.2. synthesis of <b>1</b> and <b>2</b>        | S3     |
| 1.3. General fluorescence measurements         | S4     |
| 1.4. Determination of detection limit          | S4     |
| 1.5. HPLC-mass analysis of the products        | S4     |
| 2. Figures                                     | S5-S21 |
| Scheme S1. Synthesis of compound <b>1</b>      | S5     |
| Figure S1. HPLC Chromatogram of <b>1</b>       | S6     |
| Figure S2. ESI-MS of <b>1</b>                  | S7     |
| Figure S3. HRMS (ESI-TOF) spectrum of <b>1</b> | S8     |
| Figure S4. <sup>1</sup> H NMR of <b>1</b>      | S9     |
| Figure S5. <sup>13</sup> C NMR of <b>1</b>     | S10    |
| Figure S6. HPLC chromatogram of <b>2</b>       | S11    |
| Figure S7. HRMS (ESI-TOF) spectrum of <b>2</b> | S12    |
| Figure S8. <sup>1</sup> H NMR of <b>2</b>      | S13    |
| Figure S9. <sup>13</sup> C NMR of <b>2</b>     | S14    |

|                                                                                                                                                    |     |
|----------------------------------------------------------------------------------------------------------------------------------------------------|-----|
| Figure S10. Fluorescent spectrum and time-dependent emission intensity at 500 nm of <b>1</b> with Hg <sup>2+</sup>                                 | S15 |
| Figure S11. Fluorescent spectrum and time-dependent emission intensity at 500 nm of <b>1</b> with various mercury salts                            | S16 |
| Figure S12. Fluorescent spectra of <b>2</b> (10 $\mu$ M) with Hg <sup>2+</sup>                                                                     | S17 |
| Figure S13. Linear intensity change of <b>1</b> as a function of HgCl <sub>2</sub>                                                                 | S18 |
| Figure S14. Fluorescent spectrum and time-dependent emission intensity at 500 nm of <b>1</b> with Hg <sup>2+</sup> and sequential addition of EDTA | S19 |
| Figure S15. Mass analysis of the major peak in HPLC                                                                                                | S20 |
| Figure S16. Partial <sup>1</sup> H NMR spectra of <b>1</b> with HgCl <sub>2</sub>                                                                  | S21 |
| Figure S17. pH-dependent absorption/emission spectrum of <b>1</b>                                                                                  | S22 |
| Figure S18. UV-visible spectrum of <b>1</b> (10 $\mu$ M) with HgCl <sub>2</sub>                                                                    | S23 |
| Figure S19. (a) Fluorescent spectrum and (b) time-dependent emission intensity of <b>1</b> with CH <sub>3</sub> HgCl                               | S24 |
| Figure S20. HPLC analysis using C <sub>18</sub> column for <b>1</b> with CH <sub>3</sub> HgCl                                                      | S25 |
| Figure S21. Mass analysis of the major peak in HPLC                                                                                                | S26 |
| Figure S22. Cell image study of <b>1</b> with HgCl <sub>2</sub> and CH <sub>3</sub> HgCl                                                           | S27 |
| Table S1. Comparison of the detection properties of fluorescent probes for methylmercury                                                           | S28 |
| Table S2. Photo-physical data for <b>3</b> and <b>4</b> in various solvent                                                                         | S29 |
| References                                                                                                                                         | S30 |

## 1. Experimental Section

### 1.1. Reagents:

Dansyl Chloride and, Aniline were purchased from TCI chemicals. 4 aminophenylboronic acid pinacol ester and Triethylamine were purchased from Sigma Aldrich.

### 1.2. Synthesis of 1 and 2

#### 1.2.1 Synthesis of 1

Dansyl chloride (100 mg, 0.37 mmol) and triethylamine (155  $\mu$ L, 1.11 mmol) were added to a solution of 4-aminophenylboronic acid pinacol ester (77 mg, 0.35 mmol) in dichloromethane (10 mL). The reaction mixture was stirred at room temperature for 3 h, and the progress of the reaction was monitored by TLC. Upon completion of the reaction, Trifluoroacetic acid (268  $\mu$ L, 3.5 mmol) was added and the reaction mixture was stirred at room temperature for 2 h. The solvent was removed by rotary evaporator and the crude product was purified using silica gel column chromatography (eluent: EtOAc/hexane, 1:4, v/v) to give the product as a light yellow solid, **1**. Compound **1** with high purity was characterized by melting point, ESI-MS,  $^1\text{H}$  NMR, and  $^{13}\text{C}$  NMR spectroscopies.

Light yellow solid, yield 80%; M.P.: 162  $^{\circ}\text{C}$ ;  $^1\text{H}$  NMR (DMSO- $d_6$ )  $\delta$ : 10.75 (s, 1H), 8.42 (d,  $J$  = 8.4 Hz, 1H), 8.36 (d,  $J$  = 8.8 Hz, 1H), 8.22 (d,  $J$  = 7.6 Hz, 1H), 7.62-7.57 (m, 2H), 7.52 (d,  $J$  = 9.2, 2H), 7.24 (d,  $J$  = 7.6, 1H), 6.97 (d,  $J$  = 8.4 Hz, 2H), 2.80 (s, 6H);  $^{13}\text{C}$  NMR (DMSO- $d_6$ )  $\delta$ : 151.07, 139.39, 135.15, 134.8, 130.02, 128.98, 128.9, 128.3, 123.69, 118.94, 117.1, 115.56, 45.18; HRMS ( $m/z$ ):  $[\text{M} + \text{H}]^+$  calculated for  $\text{C}_{18}\text{H}_{19}\text{BN}_2\text{O}_4\text{S}$ : 371.1231, observed: 371.1231.

#### 1.2.21 Synthesis of 2

Dansyl chloride (100 mg, 0.37 mmol) and triethylamine (155  $\mu$ L, 1.11 mmol) were added to a solution of 4-aminobenzene (37  $\mu$ L, 0.40 mmol) in dichloromethane (10 mL). The reaction mixture was stirred at room temperature for 3 h, and the progress of the reaction was monitored by TLC. The solvent was removed by rotary evaporator and the crude product was purified using silica gel column chromatography (eluent: EtOAc/hexane, 1:4, v/v) to give the product as a light yellow solid, **2**. Compound **2** with high purity was characterized by melting point, ESI-MS,  $^1\text{H}$  NMR, and  $^{13}\text{C}$  NMR spectroscopies.

Light yellow solid, yield 86%; M. P. , 121-122  $^{\circ}\text{C}$ ;  $^1\text{H}$  NMR ( $\text{CH}_3\text{CN}-d_3$ )  $\delta$ : 8.54-8.46 (m,  $J$  = 8.4 Hz, 2H), 8.27-8.23 (m,  $J$  = 8.8 Hz, 2H), 7.71 (t,  $J$  = 7.6 Hz, 1H), 7.60-7.56 (m, 1H), 7.52 (d,  $J$  = 8.4 Hz, 1H), 7.16-7.11 (m, 2H), 7.02-6.98 (m, 2H), 4.49 (brs, 1H), 2.97 (s, 6H);  $^{13}\text{C}$  NMR ( $\text{CH}_3\text{CN}-d_3$ )  $\delta$ : 147.44, 137.94, 135.95, 131.79, 130.18, 129.77, 129.13, 128.94, 125.70, 125.64, 123.14, 121.34, 46.49; HRMS ( $m/z$ ):  $[\text{M} + \text{H}]^+$  calculated for  $\text{C}_{18}\text{H}_{18}\text{N}_2\text{O}_2\text{S}$ : 327.1161, observed: 327.1160.

### 1.3 General fluorescence measurements

A stock solution of **1** ( $0.5 \times 10^{-3}$  M) was prepared in CH<sub>3</sub>CN and distilled water (1:1) and stored in a cold and dark place. The concentration of **1** was confirmed by UV absorbance at 330 nm for the dansyl group. A stock solution (500  $\mu$ M) of HgCl<sub>2</sub> was prepared in distilled water. A stock solution (1 mM) of CH<sub>3</sub>HgCl was prepared in DMF. Fluorescence emission spectrum of a sample in a cuvette was measured in distilled water containing 1% CH<sub>3</sub>CN or in aqueous buffered solution (10 mM HEPES, at pH 7.4) containing CH<sub>3</sub>CN using a Perkin Elmer luminescence spectrophotometer (model LS 55). Emission spectra (400–700 nm) of the sample were measured by excitation with 380 nm.

### 1.4 Determination of detection limit

The detection limit was calculated based on the fluorescence titration. To determine the S/N ratio, the emission intensity of **1** without HgCl<sub>2</sub> was measured by ten times and the standard deviation of blank measurements was determined. Three independent duplication measurements of emission intensity were performed in the presence of HgCl<sub>2</sub> and each average value of the intensities was plotted as a concentration of HgCl<sub>2</sub> for determining the slope. The detection limit is then calculated with the following equation:

$$\text{Detection limit} = \frac{3\sigma}{m}$$

Where,  $\sigma$  is the standard deviation of blank measurements,  $m$  is the slope between intensity versus sample concentration.

### 1.5 HPLC-mass analysis of the reaction

The product of the reaction between **1** and HgCl<sub>2</sub> was analyzed by HPLC-MS (Thermo scientific Ultimate 3000 and MSQ plus) with a Agilent C18 column using a water (0.1% TFA)–acetonitrile (0.1% TFA) gradient. To a solution of **1** (10  $\mu$ M) in water (1 mL) containing 1% CH<sub>3</sub>CN was added HgCl<sub>2</sub> (5  $\mu$ M) and incubates 20 min at room temperature. This reaction mixture was injected to the HPLC-MS and collected the data after run finished.

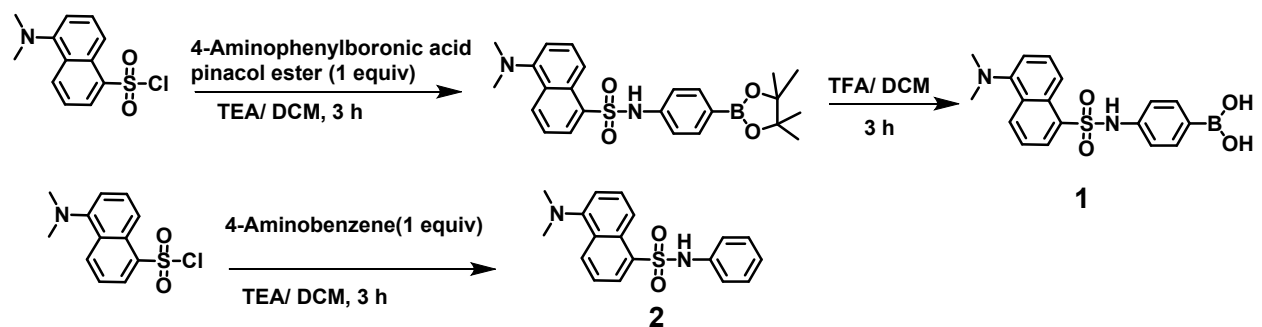

**Scheme S1.** Synthesis of **1** and **2**.

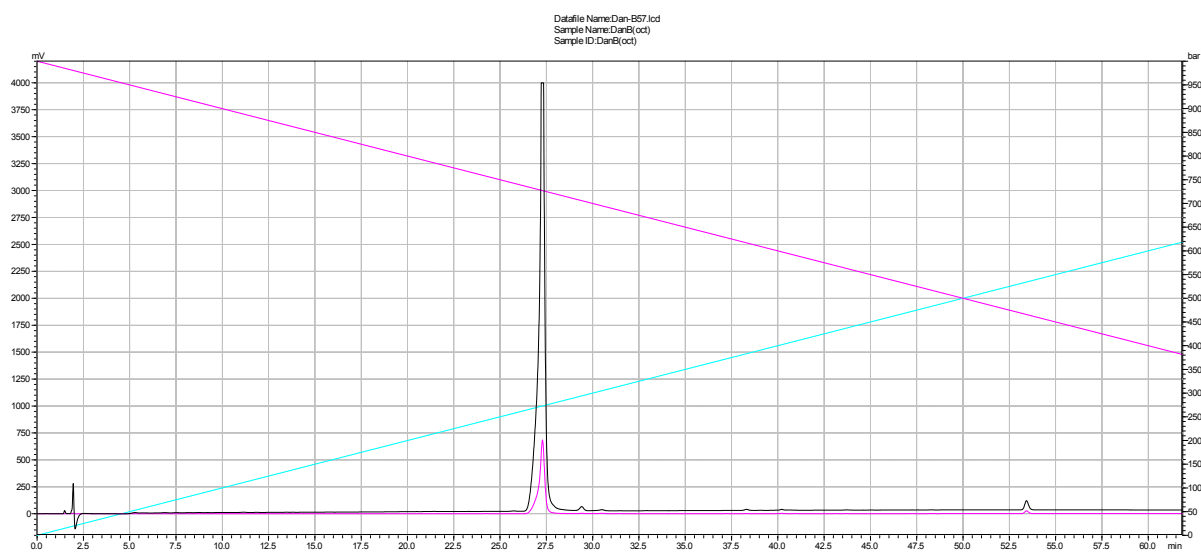

**Figure S1.** HPLC chromatogram of **1**. Black line and red line indicated the absorbance at 214 nm and 280 nm, respectively.

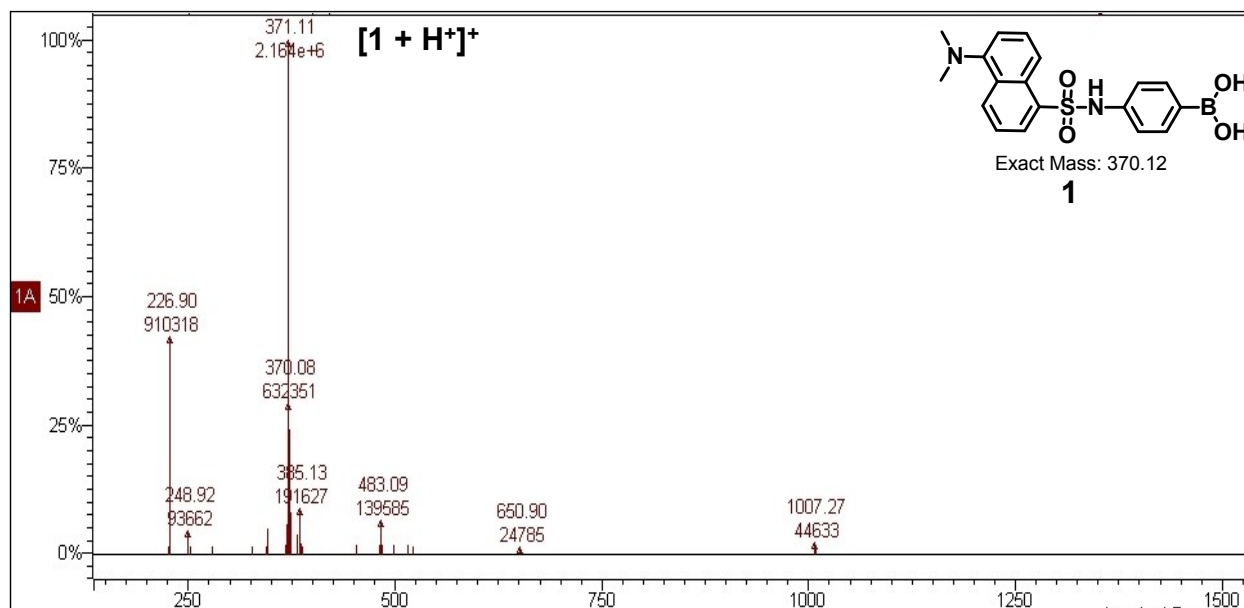

**Figure S2.** ESI-mass spectrum of **1**.

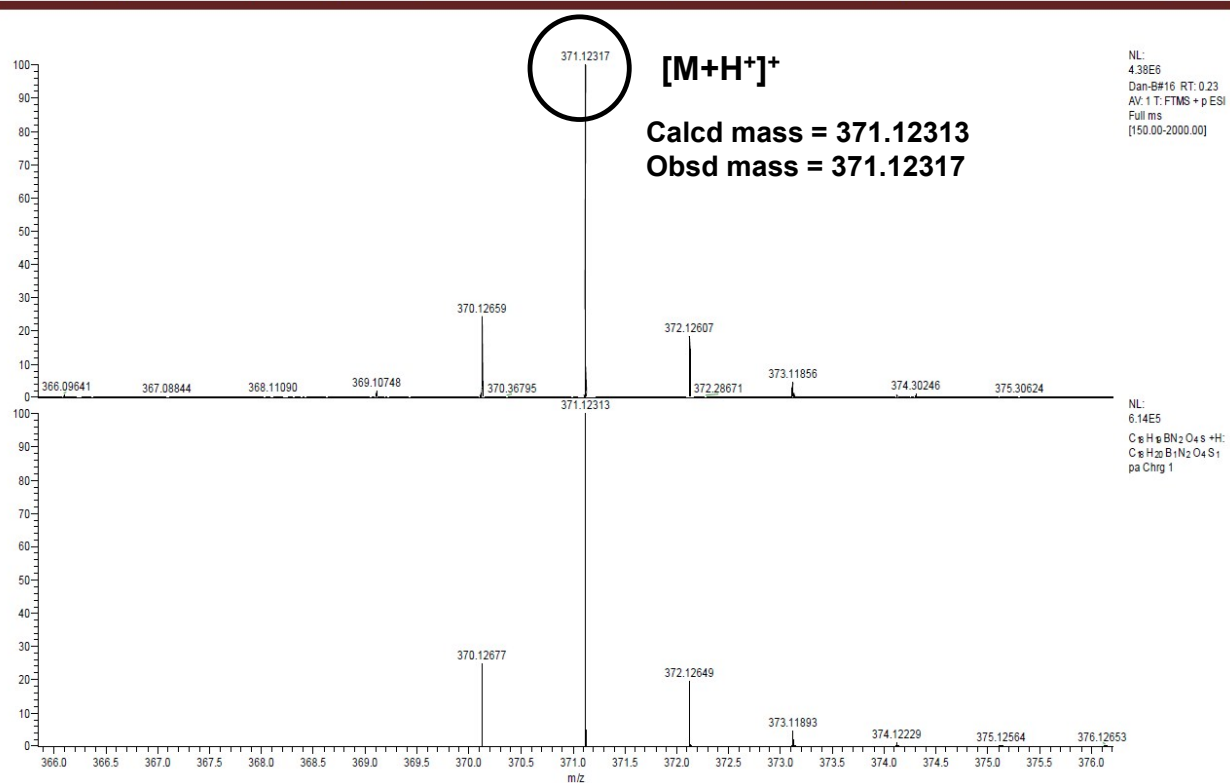

**Figure S3.** HR Mass Spectrum of **1**.



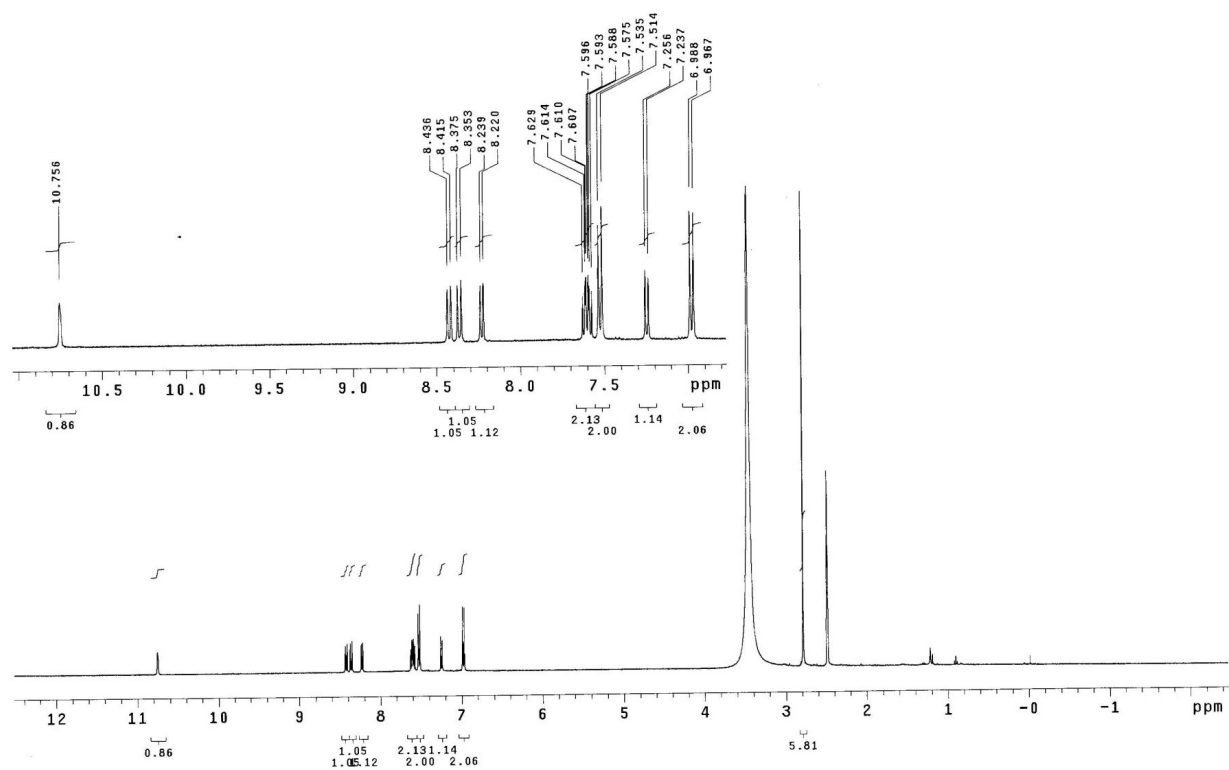

**Figure S4.** <sup>1</sup>H NMR of 1.

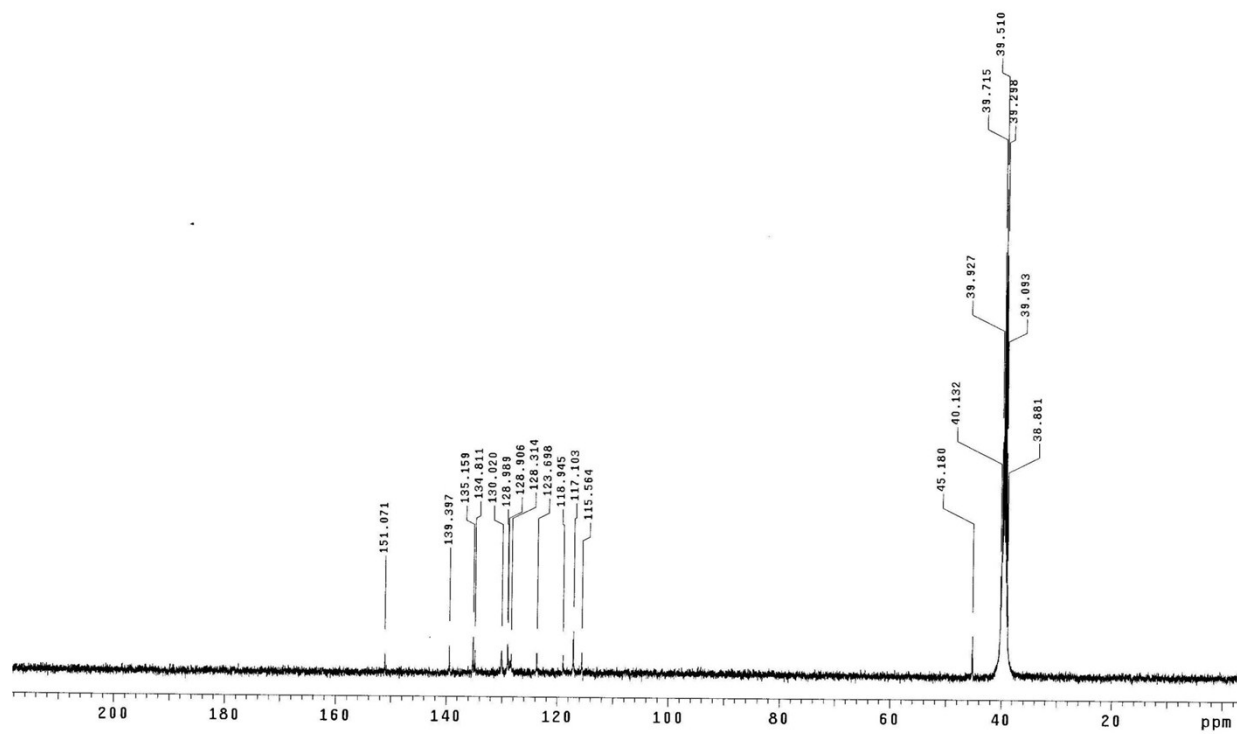

Figure S5. <sup>13</sup>C NMR of 1.

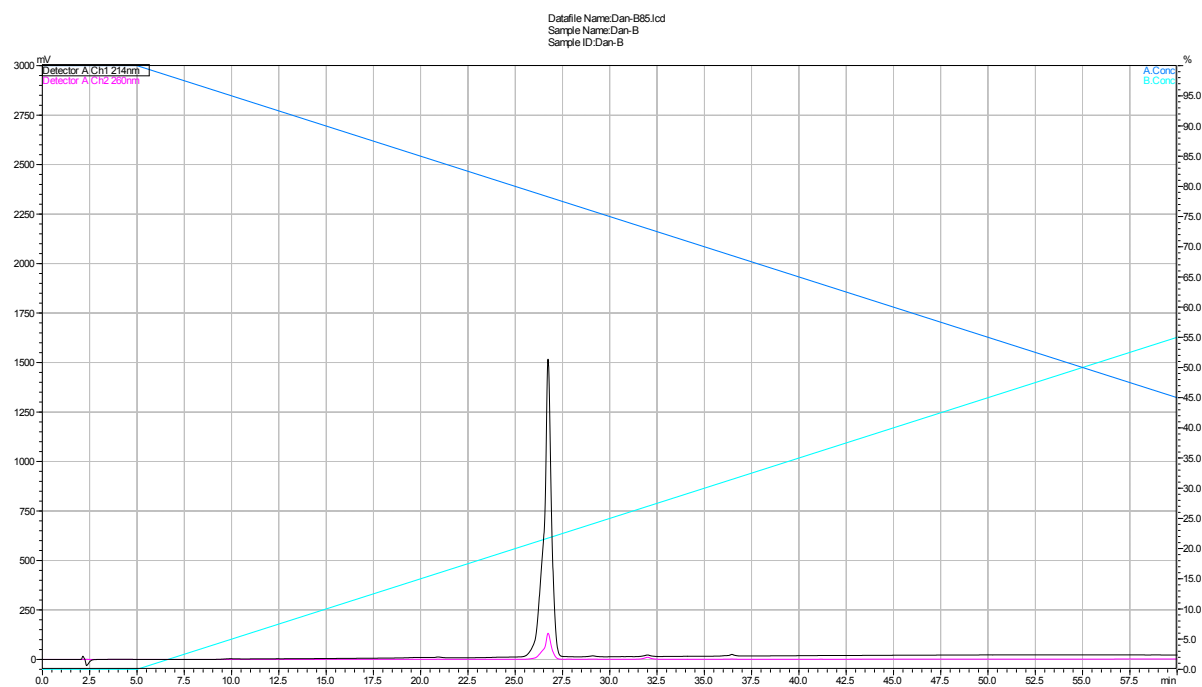

**Figure S6.** HPLC chromatogram of **2**. Black line and red line indicated the absorbance at 214 nm and 280 nm, respectively.

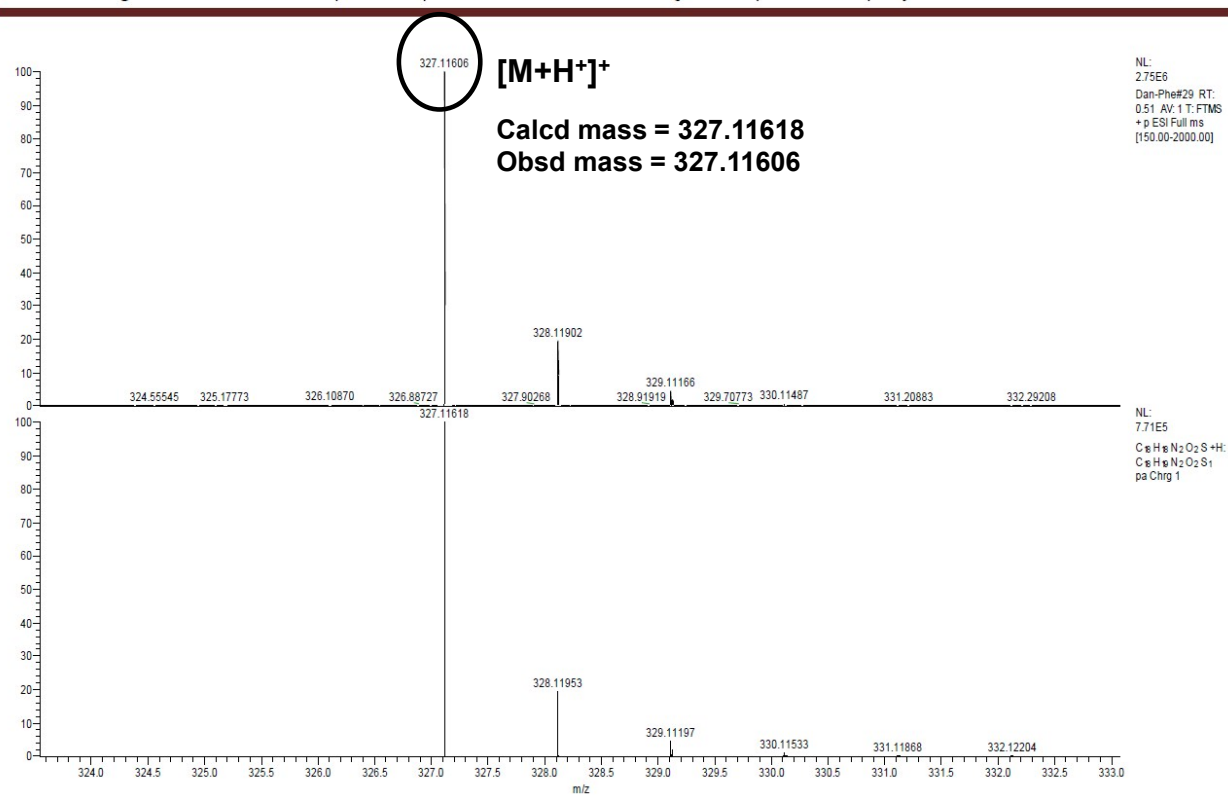

**Figure S7.** HR Mass Spectrum of **2**.

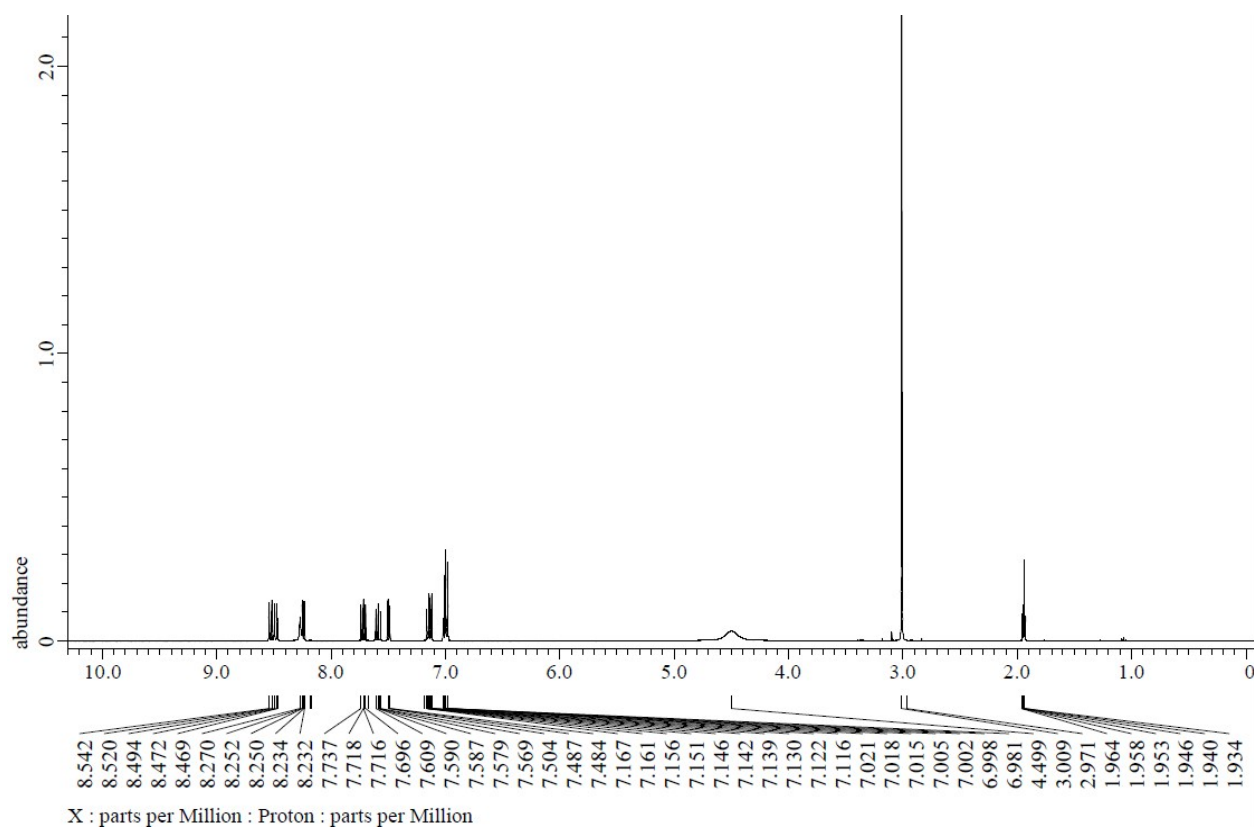

**Figure S8.**  $^1\text{H}$  NMR of **2**.

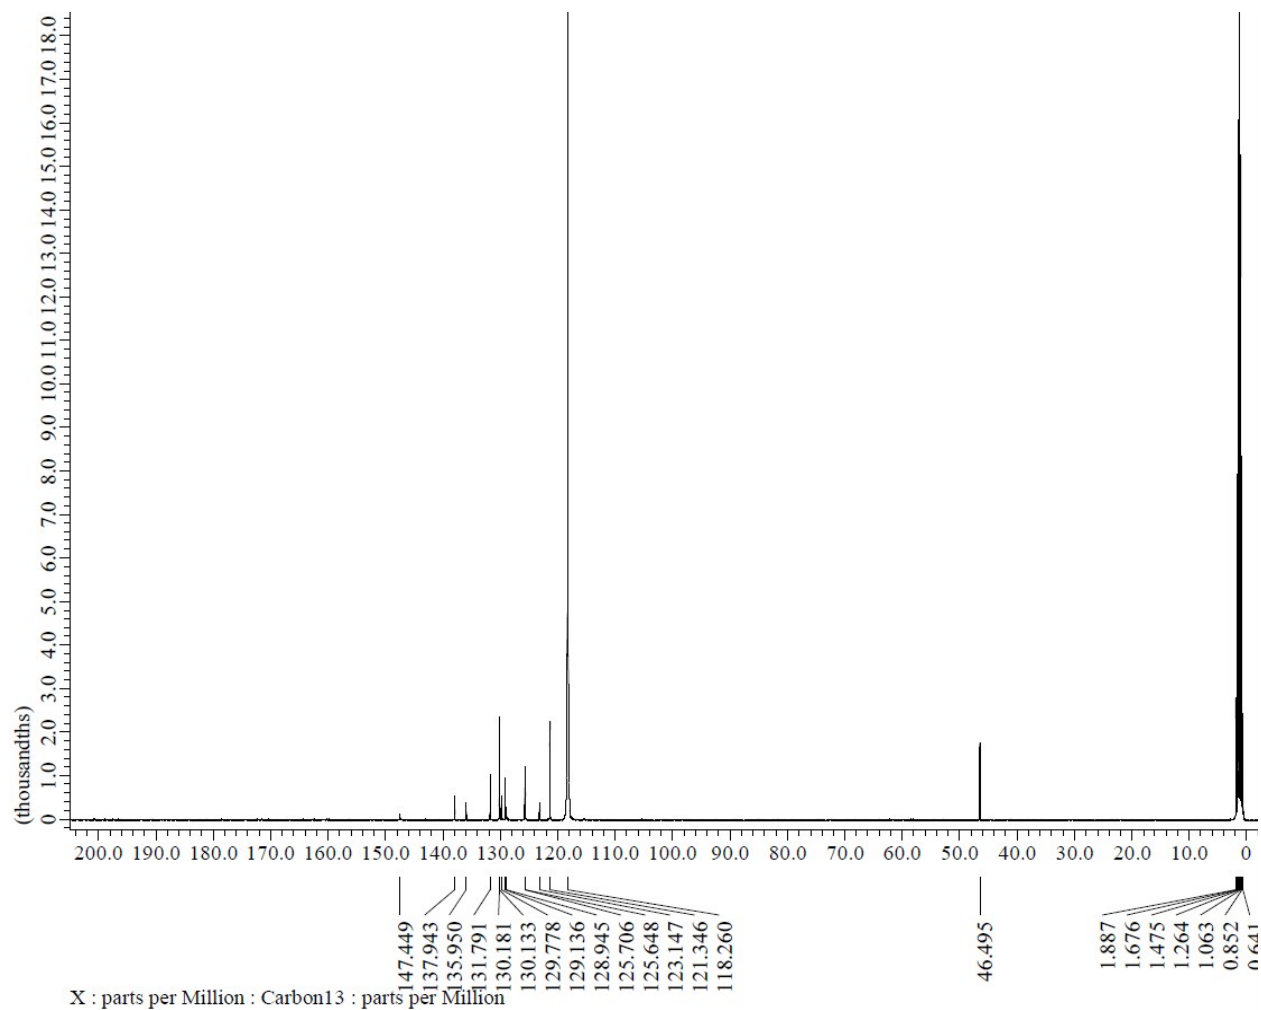

**Figure S9.**  $^{13}\text{C}$  NMR of **2**.

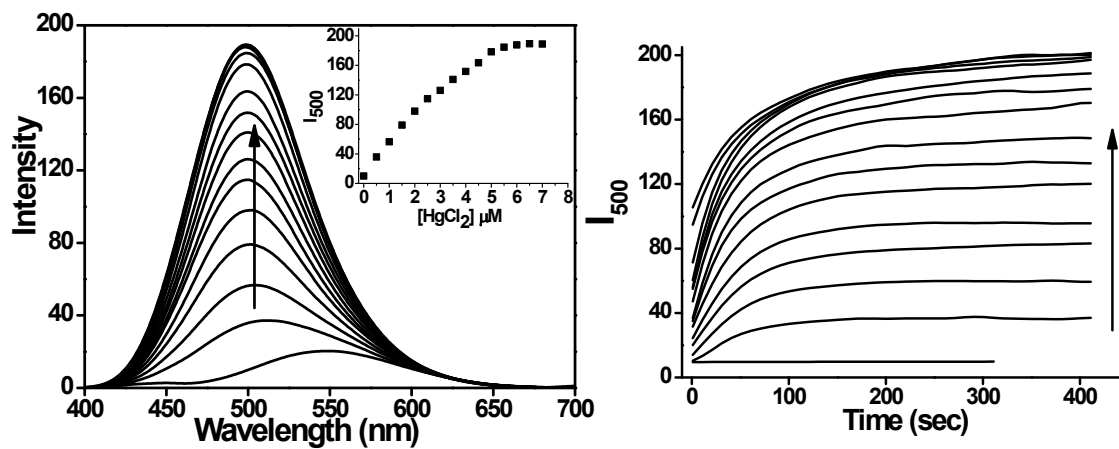

**Figure S10.** Fluorescent spectrum and time-dependent emission intensity at 500 nm of **1** (10  $\mu\text{M}$ ) with  $\text{Hg}^{2+}$  (0-0.7 equiv.) in (a) water- $\text{CH}_3\text{CN}$  (99/1, v/v) and (b) aqueous buffered solution (10 mM HEPES, pH 7.4) containing 1%  $\text{CH}_3\text{CN}$  ( $\lambda_{\text{ex}} = 380$  nm).

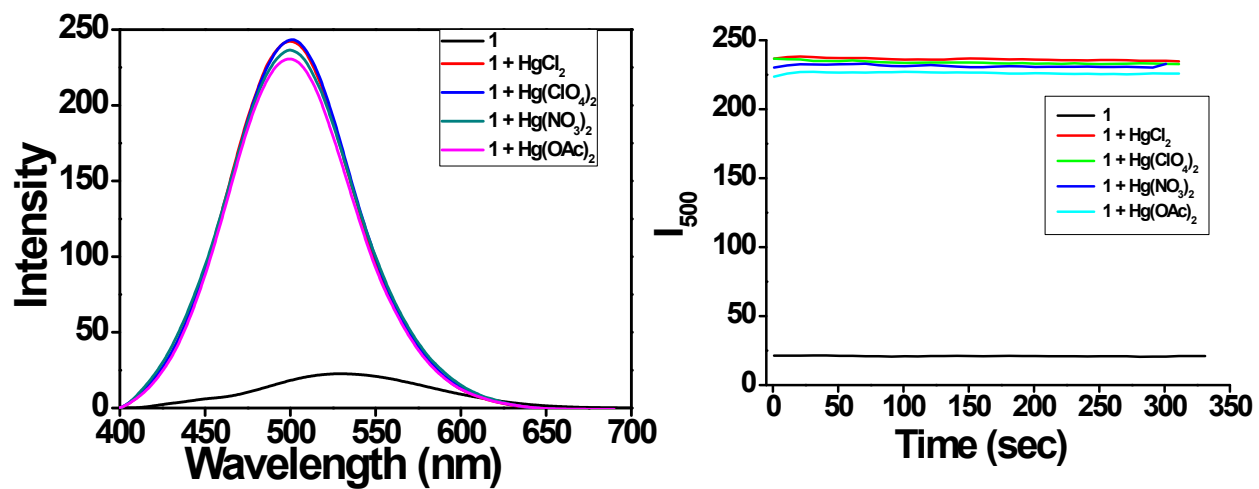

**Figure S11.** Fluorescent spectrum and time-dependent emission intensity at 500 nm of **1** (10 μM) with various mercury salts (1 equiv) in aqueous buffered solution (10 mM HEPES) at pH 7.4 containing 1% (v/v) CH<sub>3</sub>CN ( $\lambda_{\text{ex}}$  = 380 nm).



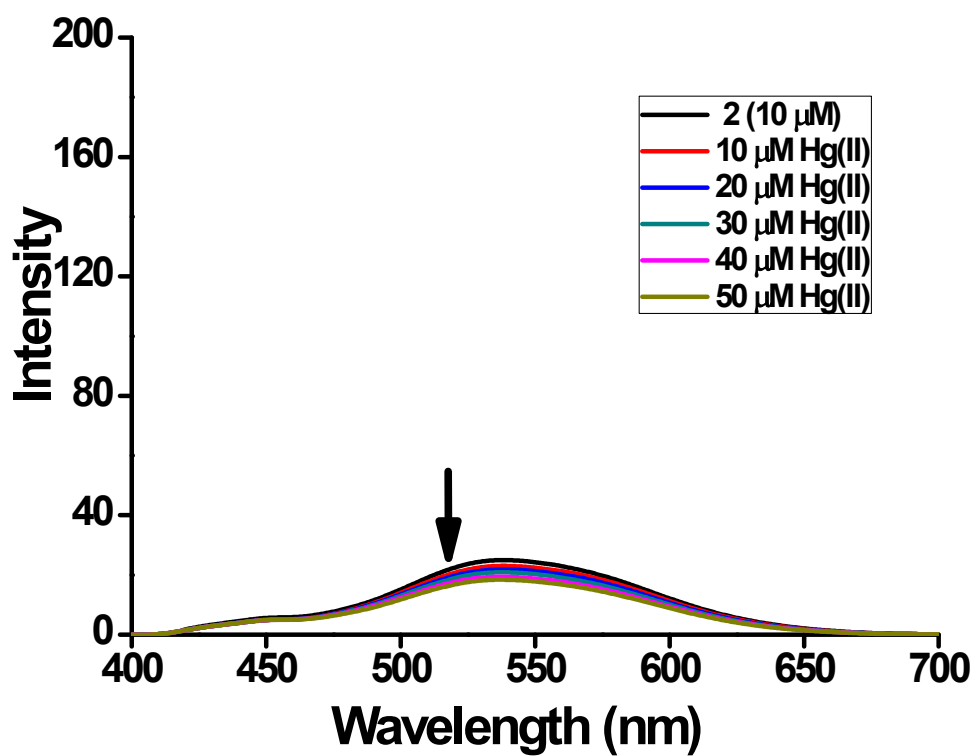

**Figure S12.** Fluorescent spectrum of **2** (10  $\mu\text{M}$ ) with  $\text{HgCl}_2$  in aqueous buffered solution (10 mM HEPE) at pH 7.4 containing 1% (v/v)  $\text{CH}_3\text{CN}$  ( $\lambda_{\text{ex}} = 380 \text{ nm}$ ).

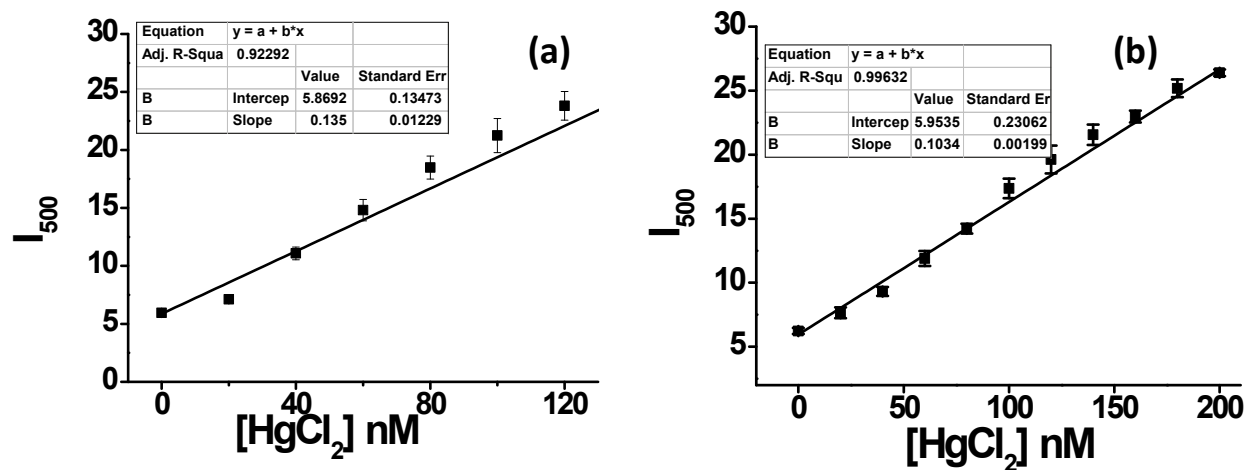

**Figure S13.** Linear emission intensity change of (a) **1** (2  $\mu\text{M}$ ) as a function of  $\text{HgCl}_2$  in distilled water including 0.5%  $\text{CH}_3\text{CN}$  (b) **1** (500 nM) as a function of  $\text{HgCl}_2$  in aqueous buffered solution (10 mM HEPE) at pH 7.4 including 0.5%  $\text{CH}_3\text{CN}$ .

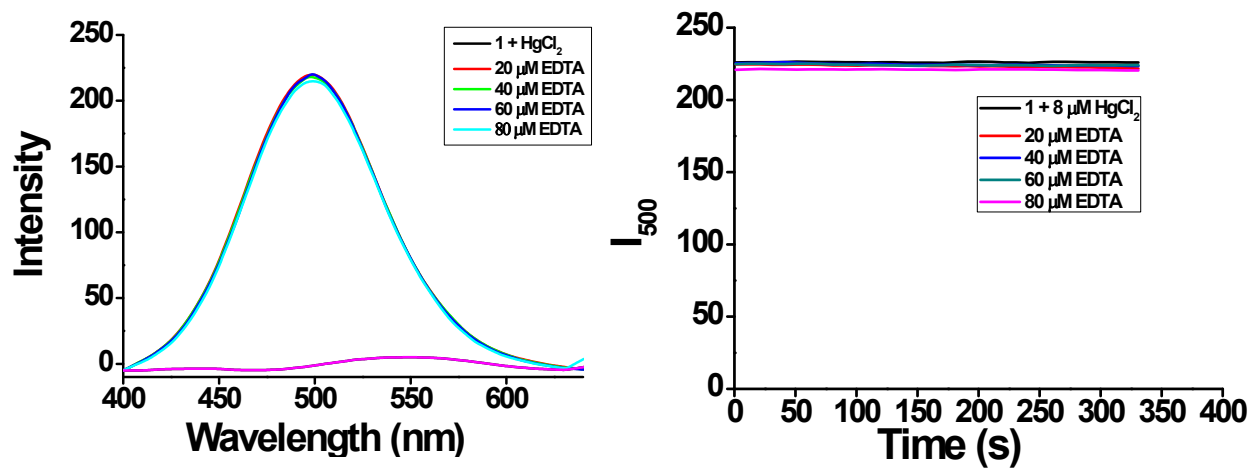

**Figure S14.** Fluorescent spectrum and time-dependent emission intensity at 500 nm of **1** (10  $\mu\text{M}$ ) with  $\text{Hg}^{2+}$  (0.8 equiv, 8  $\mu\text{M}$ ) and sequential addition of EDTA (20, 40, 60, and 80  $\mu\text{M}$ ) after 10 min incubation in aqueous buffered solution (10 mM HEPE) at pH 7.4 containing 1%  $\text{CH}_3\text{CN}$ .

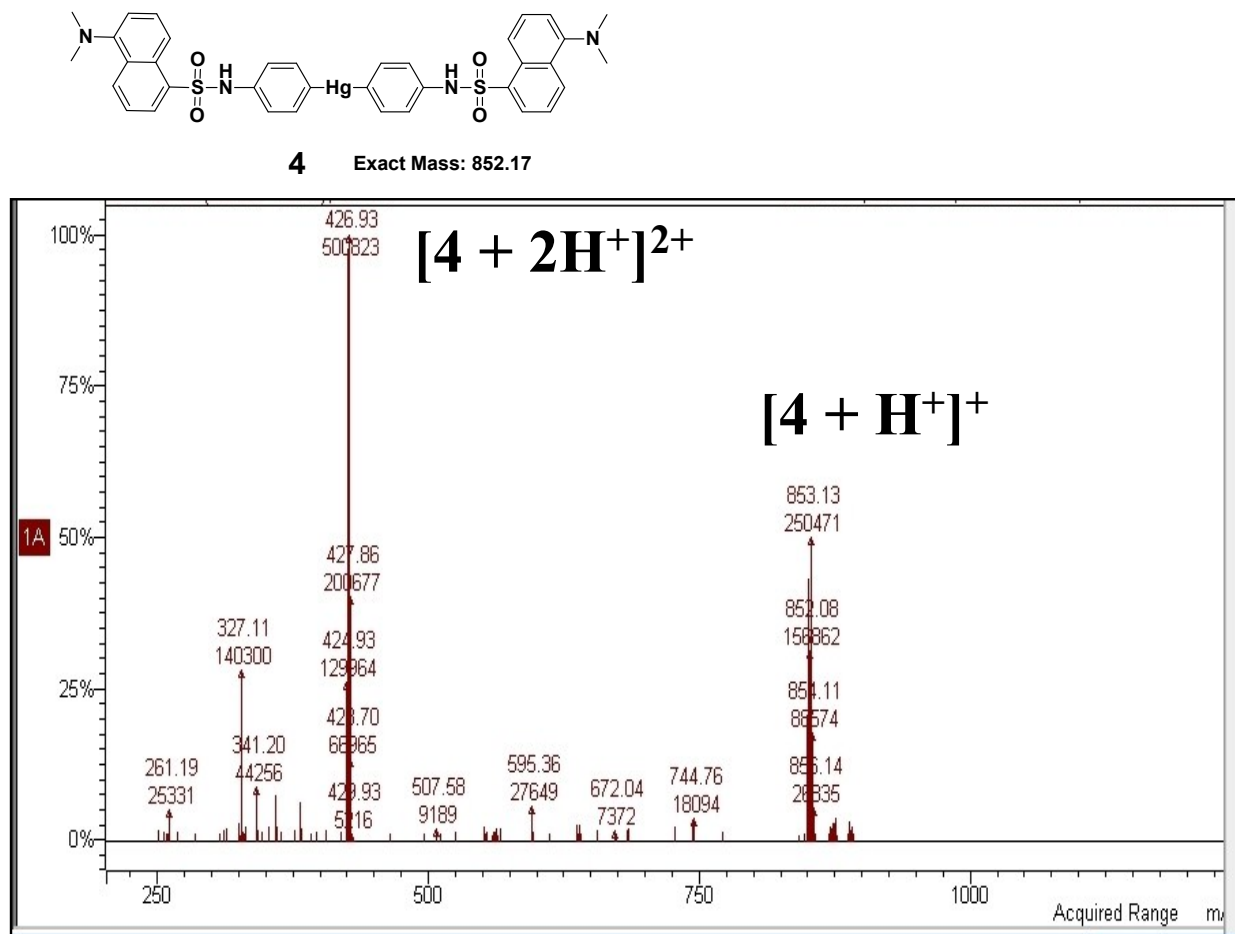

**Figure S15.** Mass spectrum of the peak at 52 min with positive ion mode.

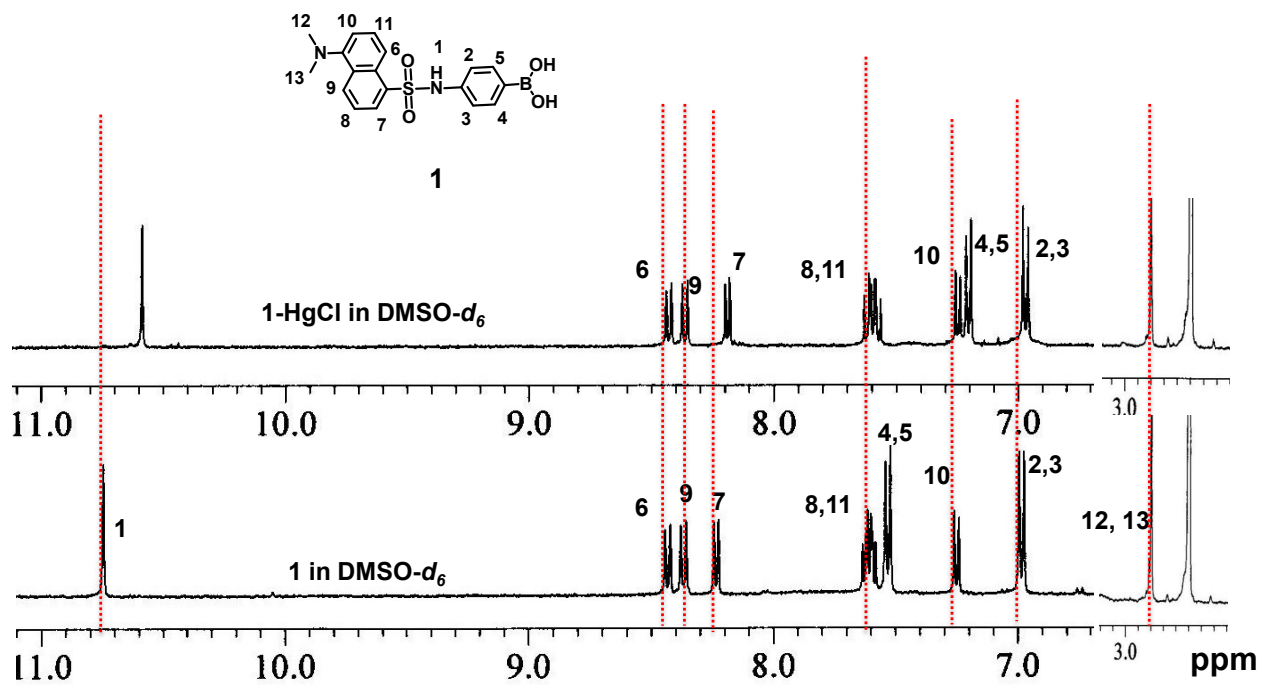

**Figure S16.** Partial  $^1\text{H}$  NMR spectra (400 MHz) of **1** (3 mM) in the presence of  $\text{HgCl}_2$  (1 equiv) in  $\text{DMSO}-d_6$ .

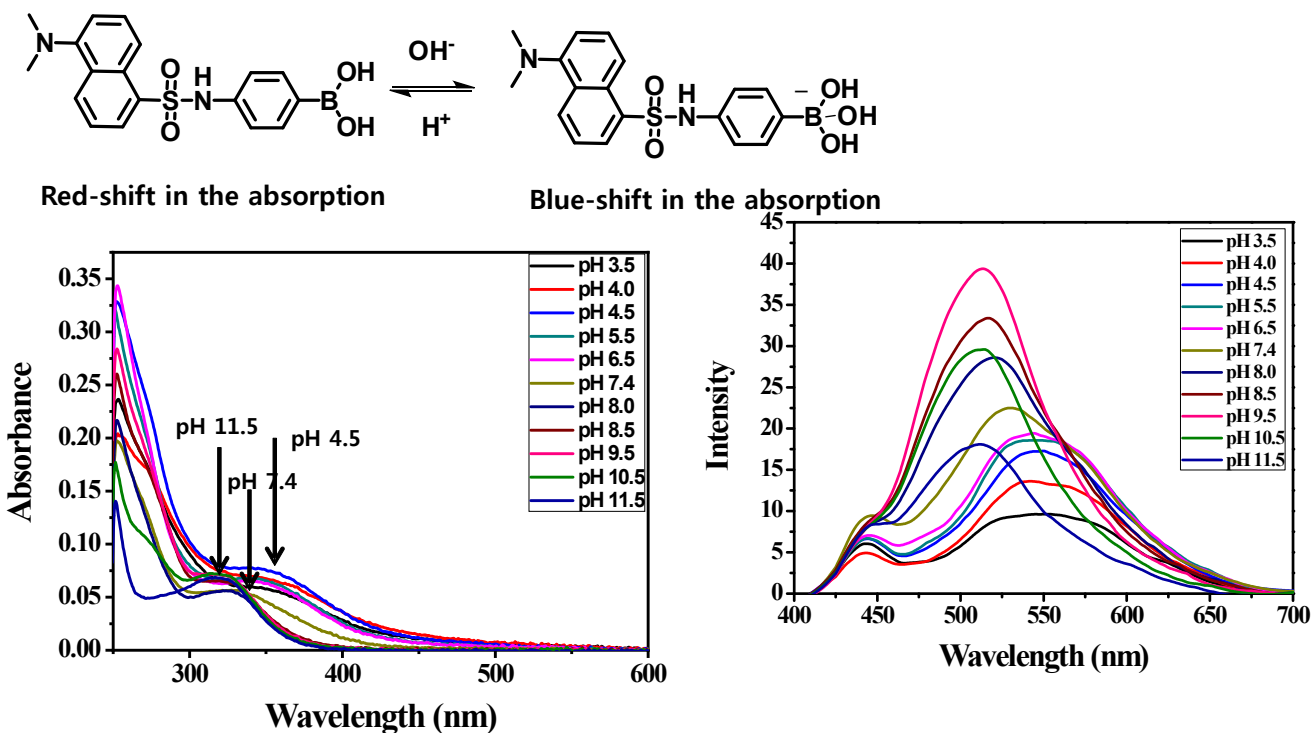

**Figure S17.** UV-visible spectrum and emission spectrum of **1** (10 μM) in aqueous buffered solution at various pHs (Acetate, pH 3.5–4.0; MES, pH 4.5–5.5; HEPES, pH 6.5–8.0; CHES, 8.5–11.5). The excitation wavelength was 380 nm.

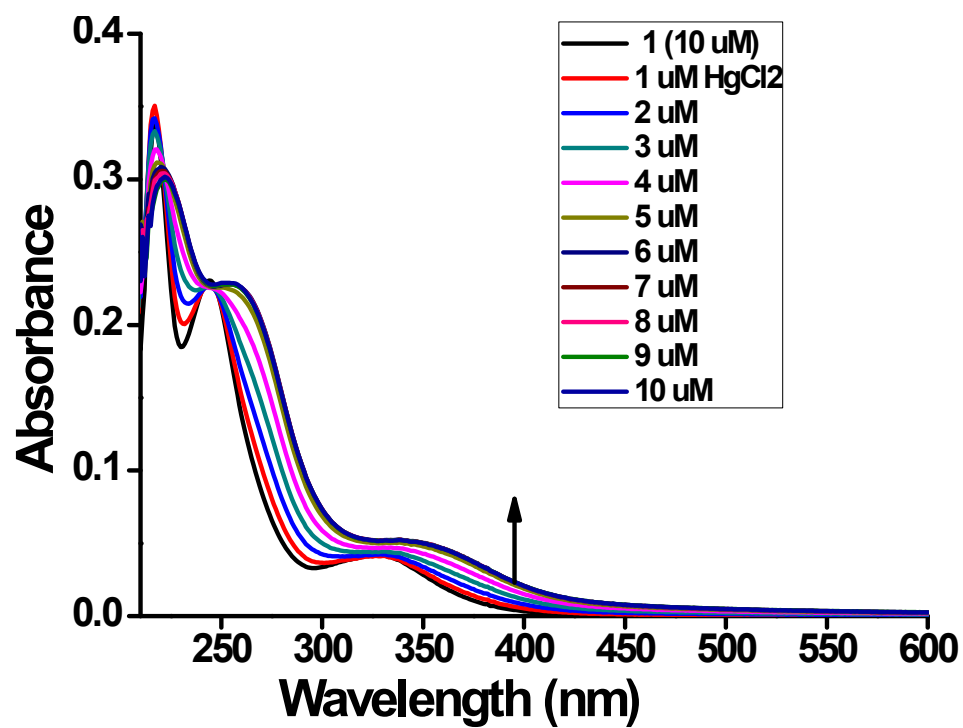

**Figure S18.** UV-visible spectrum of **1** (10  $\mu\text{M}$ ) with  $\text{HgCl}_2$  in distilled water containing 1%  $\text{CH}_3\text{CN}$ .

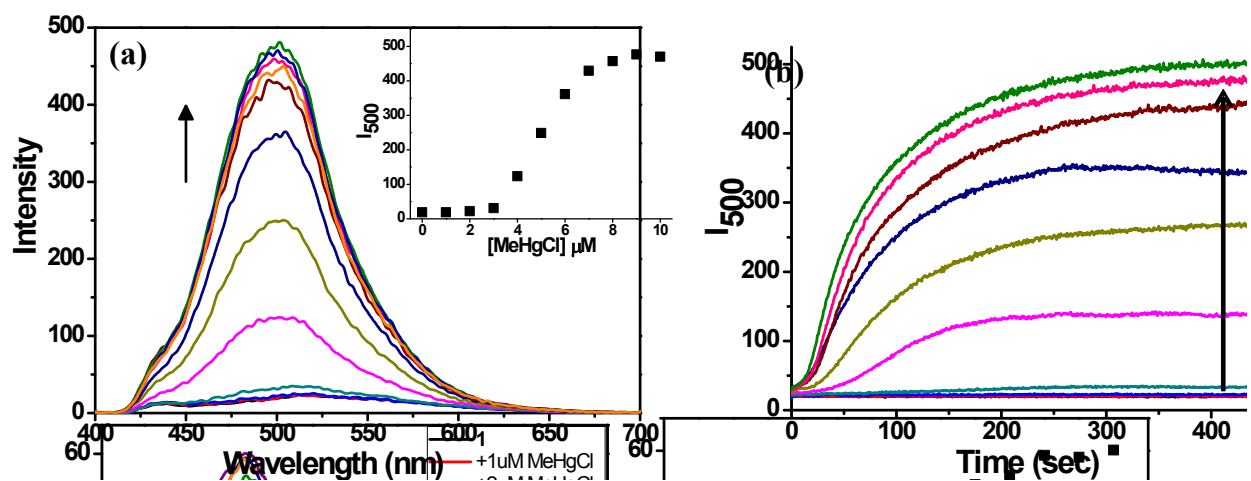

**Figure S19.** (a) Fluorescent spectrum and (b) time-dependent emission intensity of **1** (10 μM) with CH<sub>3</sub>HgCl (0-1.0 equiv.) in aqueous buffered solution (10 mM HEPES, pH 7.4) containing 1% CH<sub>3</sub>CN. The emission intensity was acquired 5 mins after addition of CH<sub>3</sub>HgCl ( $\lambda_{\text{ex}}$  = 380 nm).



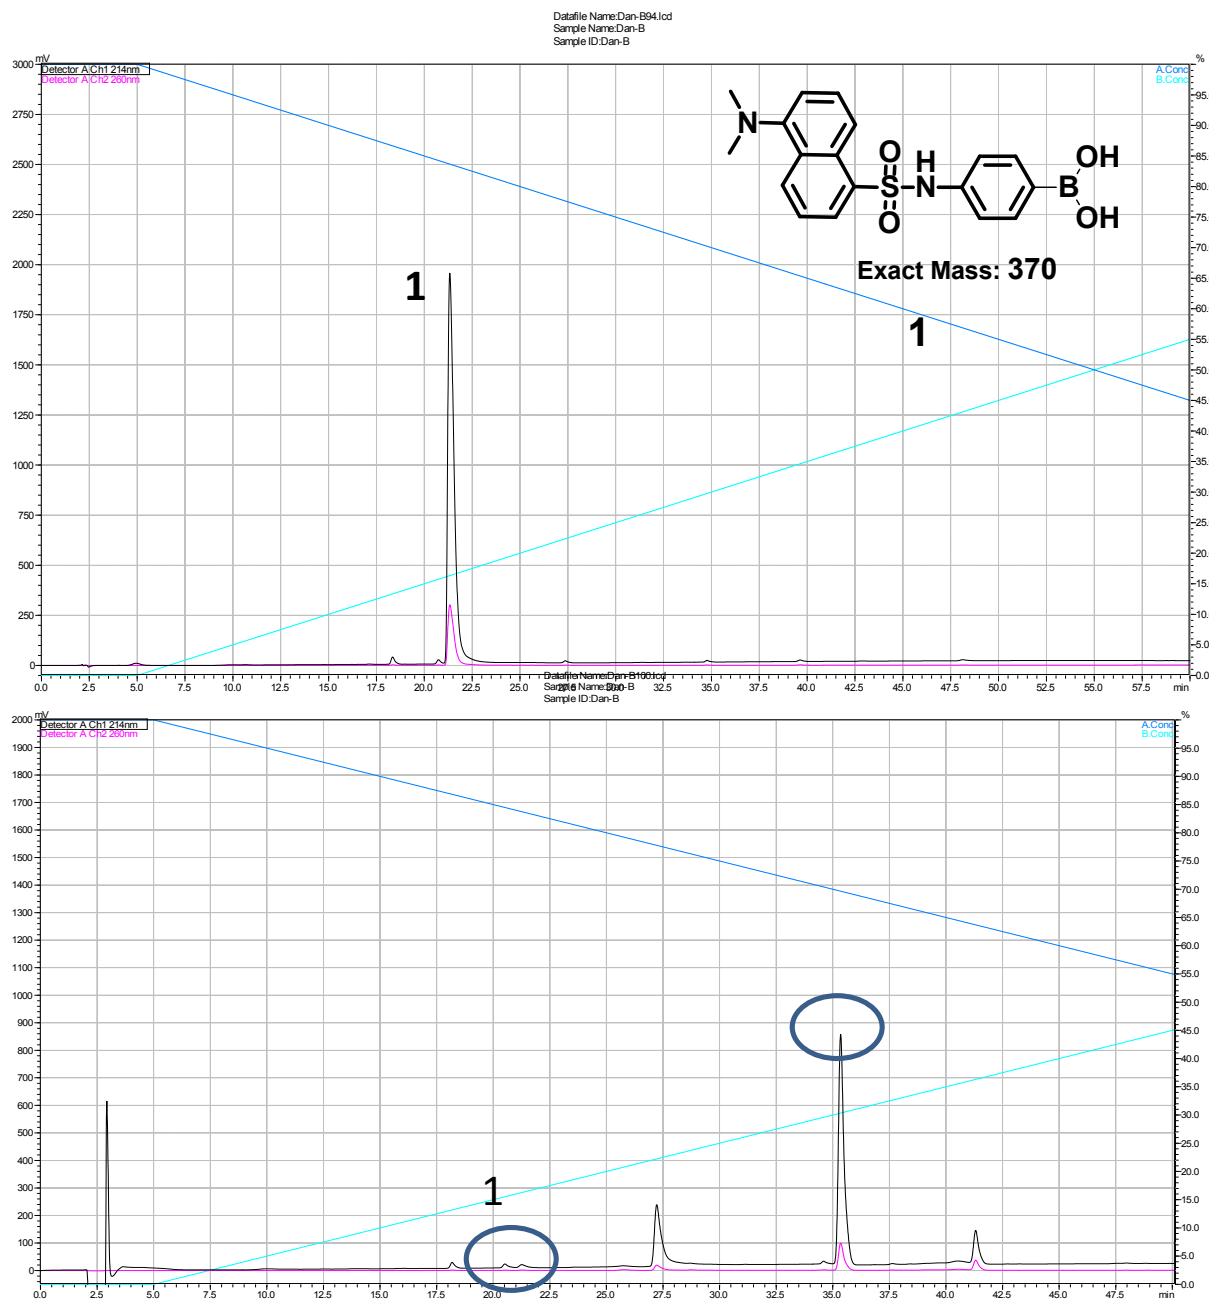

**Figure S20.** HPLC analysis using C<sub>18</sub> column of (a) **1** and (b) **1** with CH<sub>3</sub>HgCl (1.0 equiv) incubated in distilled water containing 2% CH<sub>3</sub>CN. Black line and red line indicated the absorbance at 214 nm and 280 nm, respectively.

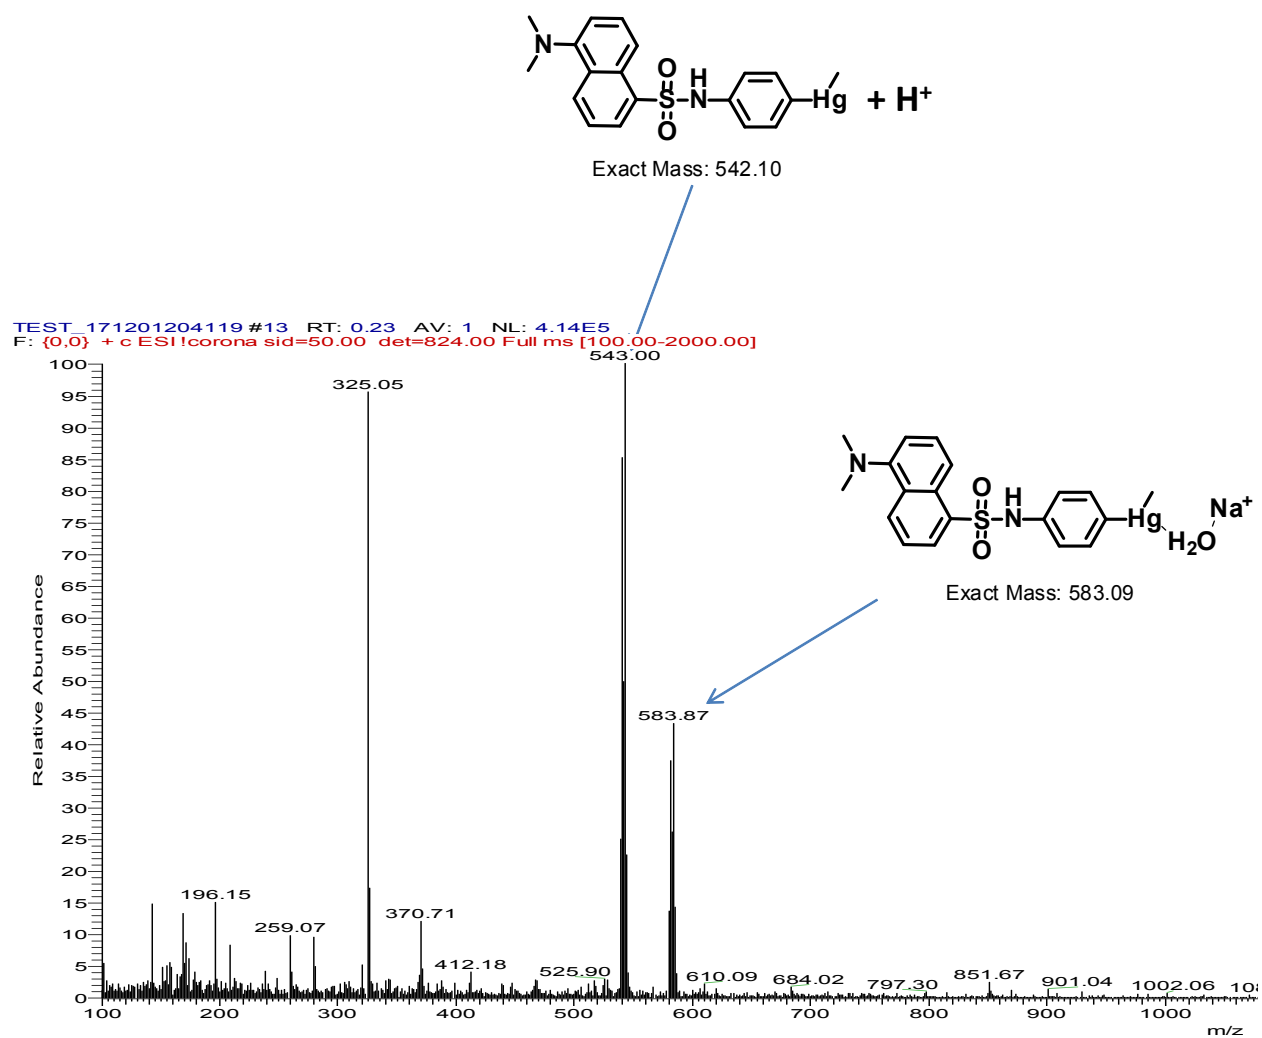

**Figure S21.** Mass spectrum of the peak at 35.5 min with positive ion mode and a possible product structure of the displacement reaction of **1** with  $\text{CH}_3\text{HgCl}$ .

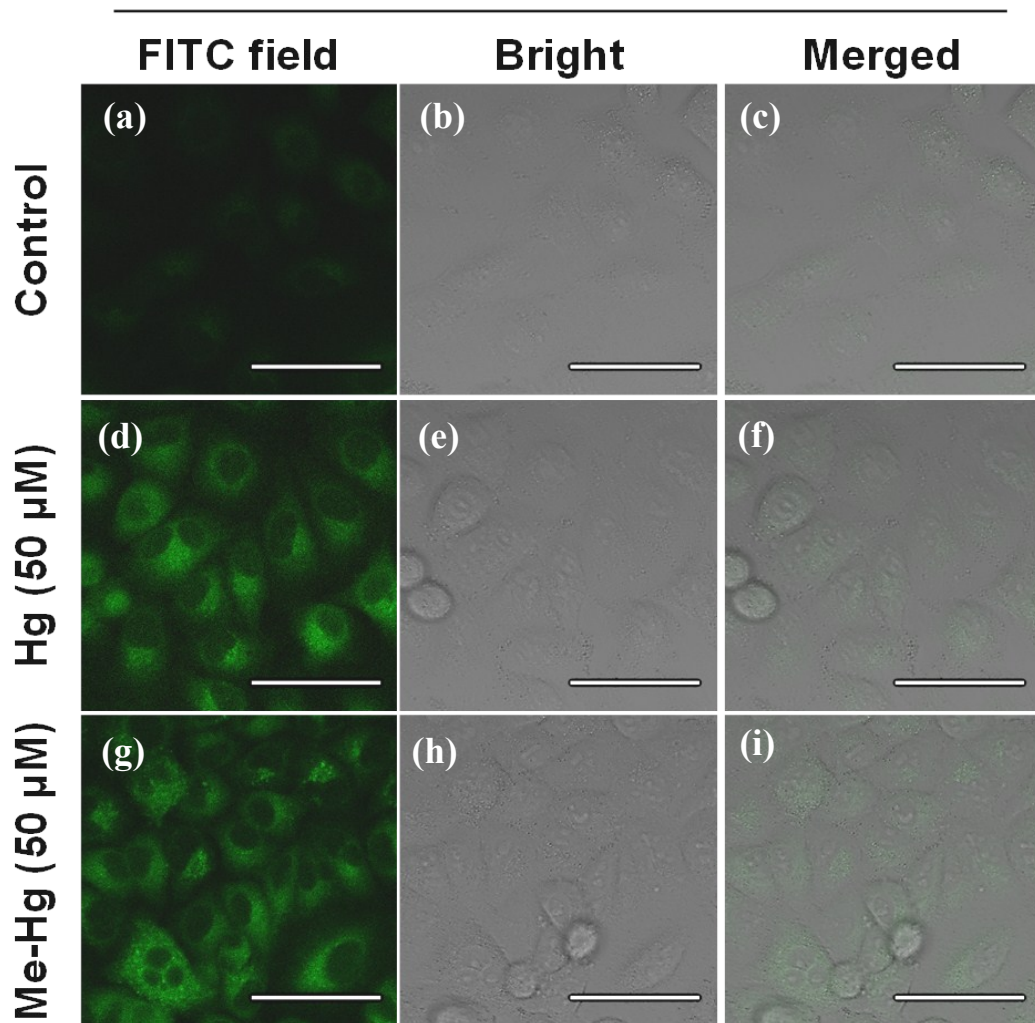

**Figure S22.** Confocal fluorescence images of A549 cells incubated with **1** (30  $\mu$ M) (top), and further incubated with  $\text{HgCl}_2$  (50  $\mu$ M) (middle), and  $\text{CH}_3\text{HgCl}$  (50  $\mu$ M), bright-field images (a, d, g), confocal fluorescent images (b, e, h) and merged images (c, f, i). The emission intensities collected in optical windows between 490 and 550 nm [Scale bar = 20  $\mu$ m].

Table S1. Comparison of the detection properties of fluorescent probes for methylmercury

| Reaction with methylmercury                                                         | Solvent                                        | Emission wavelength (nm) | Saturation (equiv.) | Reaction Time (equiv. of $\text{CH}_3\text{Hg}^+$ ) | Ref.      |
|-------------------------------------------------------------------------------------|------------------------------------------------|--------------------------|---------------------|-----------------------------------------------------|-----------|
| 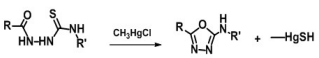   | $\text{H}_2\text{O}/\text{DMSO}$<br>99/1 (v/v) | 560 nm                   | 8                   | 20 min (10 eq.)                                     | 1         |
|    | $\text{H}_2\text{O}/\text{DMSO}$<br>95/5 (v/v) | 520 nm                   | 1                   | 100 min (1 eq.)                                     | 2         |
|    | $\text{H}_2\text{O}/\text{EtOH}$<br>1:4 (v/v)  | 660~800 nm               | 8                   | 20 min (8 eq.)                                      | 3         |
|   | $\text{H}_2\text{O}/\text{ACN}$<br>99/1 (v/v)  | 580 nm                   | 10                  | 10 min (10 eq.)                                     | 4         |
|  | $\text{H}_2\text{O}/\text{ACN}$<br>99/1 (v/v)  | 500~550 nm               | 1                   | 5 min (1 eq.)                                       | This work |

Table S2. The absorption and fluorescence maximum of 4 and 3 in various solvents at room temperature

| Solvent ( $\epsilon$ ) | 4                                 |                                  | 3                                 |                                  |
|------------------------|-----------------------------------|----------------------------------|-----------------------------------|----------------------------------|
|                        | $\lambda_{\text{abs}}(\text{nm})$ | $\lambda_{\text{em}}(\text{nm})$ | $\lambda_{\text{abs}}(\text{nm})$ | $\lambda_{\text{em}}(\text{nm})$ |
| Toluene (2.38)         | 345                               | 486.5                            | 341.5                             | 483.5                            |
| THF (7.52)             | 341                               | 497.5                            | 342                               | 493.5                            |
| DCM (8.93)             | 345.5                             | 510.5                            | 348.5                             | 510.5                            |
| MeOH (33.0)            | 340.5                             | 518.5                            | 340.5                             | 518                              |
| ACN (36.6)             | 343                               | 518                              | 344                               | 518                              |
| DMF (38.3)             | 345                               | 518                              | 343.5                             | 517                              |
| DMSO (47.2)            | 346                               | 517.5                            | 346.5                             | 520                              |

## References

1. Y. K. Yang, S. K. Ko, I. Shin, J. Tae, *Org. Biomol. Chem.*, 2009, **7**, 4590.
2. M. Santra, D. Ryu, A. Chatterjee, S. K. Ko, I. Shin, K. H. Ahn, *Chem. Commun.*, 2009, 2115.
3. Y. Liu, M. Chen, T. Cao, Y. Sun, C. Li, Q. Liu, T. Yang, L. Yao, W. Feng, F. Li, *J. Am. Chem. Soc.*, 2013, **135**, 9869.
4. X. Chen, K. H. Baek, Y. Kim, S. J. Kim, I. Shin, J. Yoon, *Tetrahedron*, 2010, **66**, 4016.
